# Supplementary material for: Effect of counter cations on the photochromic behaviors of three Zn–viologen complexes
Source: Royal Society of Chemistry journal article supplement (doi:10.1039/c9nj03022k), 2019-01-01
Supplement: c9nj03022k1.pdf [file c9nj03022k1.pdf]

## Counter cations effect on the photochromic behaviors of three Zn-viologen complexes

Jin-jian Liu\*, Jing Li, Wen-bo Lu

Key Laboratory of Magnetic Molecules, Magnetic Information Materials Ministry of Education, The School of Chemical and Material Science, Shanxi Normal University, Linfen 041004, China.

**Table S1.** Selected bond lengths (Å) and bond angles (°) for 1–3.

| Compound 1        |            |                   |            |
|-------------------|------------|-------------------|------------|
| Zn(1)–O(2)        | 2.082(2)   | Zn(1)–O(9)        | 2.046(2)   |
| Zn(1)–O(10)       | 2.128(2)   | Zn(1)–O(8)        | 2.124(3)   |
| Zn(1)–O(11)       | 2.121(2)   | Zn(1)–O(7)        | 2.085(2)   |
| O(2)–Zn(1)–O(10)  | 175.74(10) | O(2)–Zn(1)–O(8)   | 91.43(11)  |
| O(2)–Zn(1)–O(11)  | 94.83(9)   | O(2)–Zn(1)–O(7)   | 87.71(10)  |
| O(9)–Zn(1)–O(2)   | 86.88(10)  | O(9)–Zn(1)–O(10)  | 92.27(9)   |
| O(9)–Zn(1)–O(8)   | 86.54(11)  | O(9)–Zn(1)–O(11)  | 176.77(10) |
| O(9)–Zn(1)–O(7)   | 91.56(11)  | O(8)–Zn(1)–O(10)  | 92.68(10)  |
| O(11)–Zn(1)–O(10) | 86.22(9)   | O(11)–Zn(1)–O(8)  | 90.67(10)  |
| O(7)–Zn(1)–O(10)  | 88.14(10)  | O(7)–Zn(1)–O(8)   | 177.96(10) |
| O(7)–Zn(1)–O(11)  | 91.25(10)  |                   |            |
| Compound 2        |            |                   |            |
| Zn(1)–O(2)        | 2.1221(19) | Zn(1)–O(7)        | 2.043(2)   |
| Zn(1)–O(8)        | 2.069(2)   | Zn(1)–O(10)       | 2.130(2)   |
| Zn(1)–O(9)        | 2.1199(19) | Zn(1)–O(11)       | 2.099(2)   |
| O(2)–Zn(1)–O(10)  | 91.32(9)   | O(7)–Zn(1)–O(2)   | 87.00(8)   |
| O(7)–Zn(1)–O(8)   | 92.75(10)  | O(7)–Zn(1)–O(10)  | 85.97(10)  |
| O(7)–Zn(1)–O(9)   | 90.71(8)   | O(7)–Zn(1)–O(11)  | 177.28(9)  |
| O(8)–Zn(1)–O(2)   | 88.14(9)   | O(8)–Zn(1)–O(10)  | 178.63(9)  |
| O(8)–Zn(1)–O(9)   | 89.69(8)   | O(8)–Zn(1)–O(11)  | 89.97(9)   |
| O(9)–Zn(1)–O(2)   | 176.77(8)  | O(9)–Zn(1)–O(10)  | 90.80(8)   |
| O(11)–Zn(1)–O(2)  | 93.21(8)   | O(11)–Zn(1)–O(10) | 91.31(9)   |
| O(11)–Zn(1)–O(9)  | 89.18(8)   |                   |            |
| Compound 3        |            |                   |            |

|                  |            |                   |            |
|------------------|------------|-------------------|------------|
| Zn(1)–O(6)       | 2.1095(2)  | Zn(1)–O(10)       | 2.0542(18) |
| Zn(1)–O(7)       | 2.0988(18) | Zn(1)–O(9)        | 2.1291(17) |
| Zn(1)–O(11)      | 2.1378(19) | Zn(1)–O(8)        | 2.0745(19) |
| O(6)–Zn(1)–O(9)  | 177.30(7)  | O(6)–Zn(1)–O(11)  | 92.50(8)   |
| O(10)–Zn(1)–O(6) | 87.15(7)   | O(10)–Zn(1)–O(7)  | 176.34(8)  |
| O(10)–Zn(1)–O(9) | 91.35(7)   | O(10)–Zn(1)–O(11) | 85.15(8)   |
| O(10)–Zn(1)–O(8) | 93.08(8)   | O(7)–Zn(1)–O(6)   | 93.38(7)   |
| O(7)–Zn(1)–O(9)  | 88.25(7)   | O(7)–Zn(1)–O(11)  | 91.21(8)   |
| O(9)–Zn(1)–O(11) | 89.61(7)   | O(8)–Zn(1)–O(6)   | 88.96(8)   |
| O(8)–Zn(1)–O(7)  | 90.55(8)   | O(8)–Zn(1)–O(9)   | 88.87(7)   |
| O(8)–Zn(1)–O(11) | 177.64(8)  |                   |            |

**Table S2.** The hydrogen bond lengths (Å) in **1–3**.

| Compound 1       |       |                  |       |
|------------------|-------|------------------|-------|
| O(12)–H ···O(1)  | 1.899 | C(2)–H ···O(1)   | 2.467 |
| O(13)–H ···O(3)  | 1.939 | O(7)–H ···O(4)   | 1.874 |
| O(9)–H ···O(4)   | 2.521 | O(7)–H ···O(5)   | 1.794 |
| O(9)–H ···O(5)   | 1.852 | O(10)–H ···O(6)  | 1.911 |
| O(8)–H ···O(6)   | 2.015 | C(1)–H ···O(7)   | 2.710 |
| O(8)–H ···O(12)  | 1.785 | O(12)–H ···O(8)  | 2.616 |
| C(4)–H ···O(8)   | 2.432 | O(10)–H ···O(11) | 1.984 |
| O(11)–H ···O(10) | 1.983 | C(2)–H ···O(11)  | 2.593 |
| O(12)–H ···O(13) | 2.304 | O(12)–H ···O(13) | 2.698 |
| C(3)–H ···O(13)  | 2.579 | O(13)–H ···O(12) | 2.480 |
| C(9)–H ···O(13)  | 2.649 | C(10)–H ···O(1)  | 2.559 |
| O(11)–H ···O(1)  | 1.899 | C(9)–H ···O(2)   | 2.531 |
| C(9)–H ···O(3)   | 2.528 | C(13)–H ···O(4)  | 2.531 |
| C(13)–H ···O(5)  | 2.545 | C(10)–H ···O(6)  | 2.534 |
| O(9)–H ···O(8)   | 2.624 | O(7)–H ···O(2)   | 2.656 |
| Compound 2       |       |                  |       |
| O(12)–H ···O(1)  | 1.891 | C(3)–H ···O(1)   | 2.393 |
| O(12)–H ···O(2)  | 2.140 | O(9)–H ···O(3)   | 2.694 |
| O(7)–H ···O(4)   | 1.881 | O(8)–H ···O(4)   | 1.794 |
| O(7)–H ···O(5)   | 1.941 | O(9)–H ···O(6)   | 1.831 |
| O(10)–H ···O(6)  | 1.852 | C(1)–H ···O(6)   | 2.574 |
| O(8)–H ···N(1)   | 2.508 | C(2)–H ···O(8)   | 2.631 |
| O(11)–H ···O(9)  | 1.945 | O(9)–H ···O(11)  | 1.934 |
| C(5)–H ···O(10)  | 2.399 | O(10)–H ···O(12) | 1.786 |
| C(2)–H ···O(11)  | 2.664 | C(4)–H ···O(12)  | 2.495 |
| Compound 3       |       |                  |       |
| O(9)–H ···O(1)   | 1.839 | O(8)–H ···O(2)   | 1.911 |
| O(10)–H ···O(2)  | 1.920 | O(8)–H ···O(3)   | 1.858 |
| O(10)–H ···O(3)  | 1.948 | O(9)–H ···O(4)   | 1.859 |
| O(11)–H ···O(5)  | 2.018 | O(12)–H ···O(5)  | 1.797 |
| C(5)–H ···O(5)   | 2.434 | O(12)–H ···O(6)  | 2.101 |
| O(7)–H ···O(9)   | 1.950 | C(5)–H ···O(7)   | 2.603 |

|                |       |               |       |
|----------------|-------|---------------|-------|
| C(4)–H··O(10)  | 2.613 | C(7)–H··O(11) | 2.407 |
| O(11)–H··O(12) | 1.839 | C(1)–H··O(12) | 2.699 |

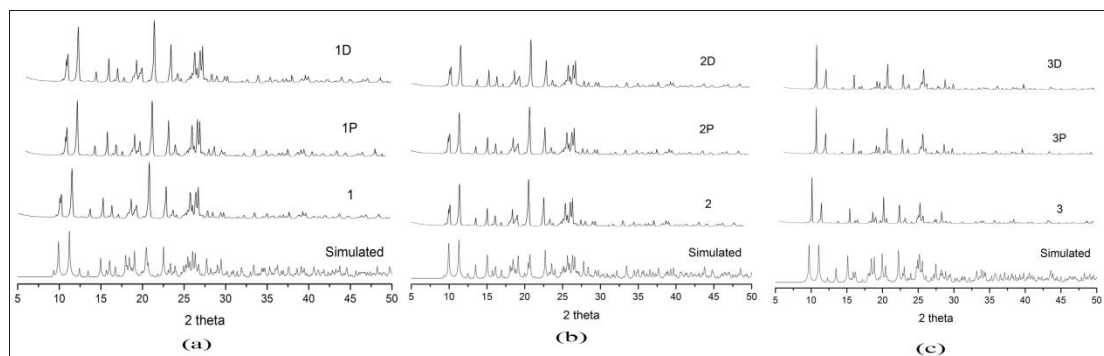

**Fig. S1.** The PXRD spectra before and after irradiation for **1-3** (**1P**, **2P**, **3P**, photoproducts for three compounds; **1D**, **2D**, **3D**, decolored samples for three compounds).

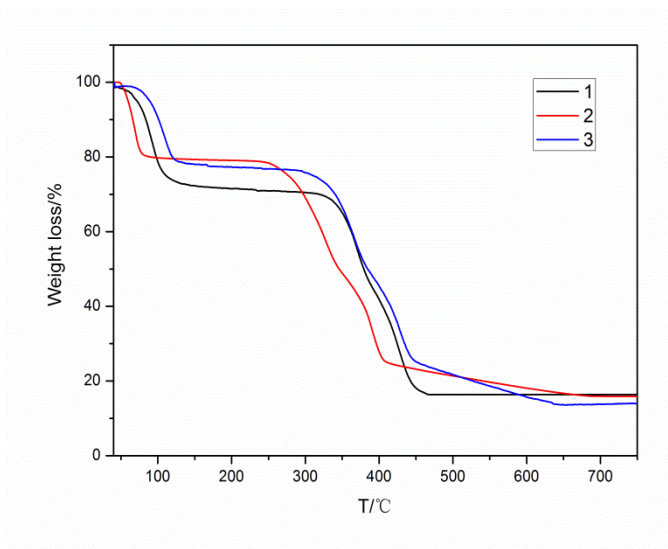

**Fig. S2.** TG tests of compounds **1-3**.

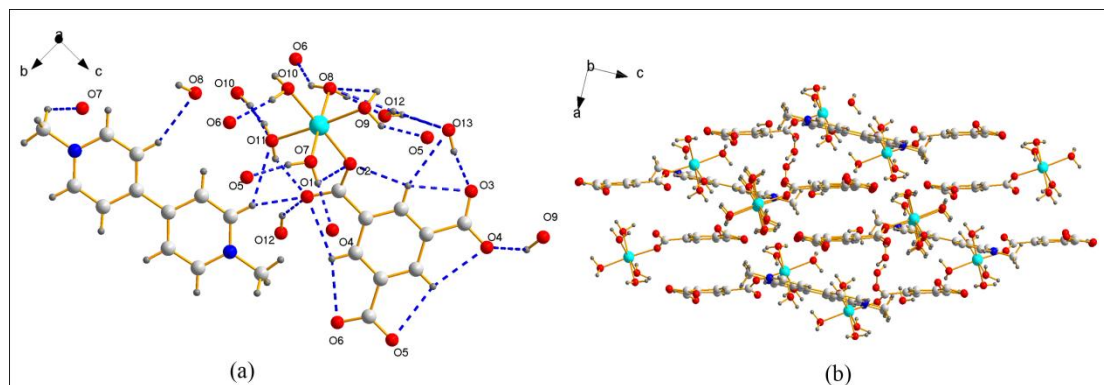

**Fig. S3.** For compound **1**: (a) Hydrogen bonding interactions; (b) Packing diagram.

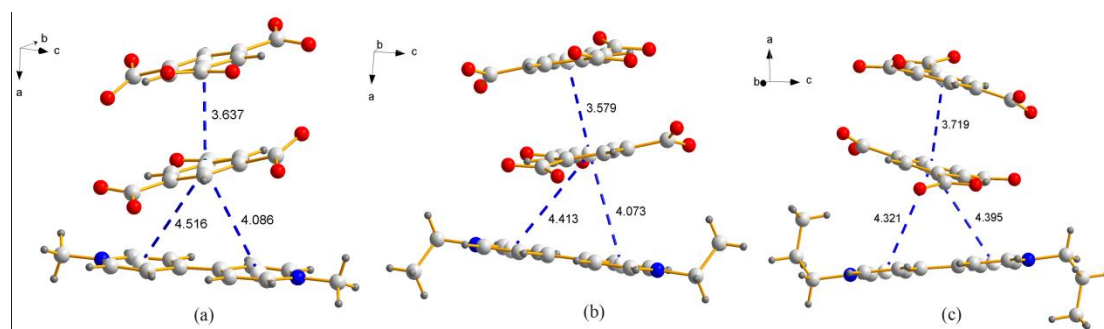

Fig. S4. The intermolecular  $\pi\cdots\pi$  interactions for **1** (a) and **2** (b) and **3** (c).

### Section S1. Kinetic rate calculations

The photochemical reactions of compounds **1-3** all exhibit first order kinetics which can be analyzed with eq<sup>[1]</sup>:

$$\ln\left(\frac{R_0 - R_\infty}{R_t - R_\infty}\right) = kt$$

where  $k$  is the first-order rate constant,  $R_0$ ,  $R_t$ ,  $R_\infty$  refer to the UV-vis diffuse reflectance intensity values (405 nm for compound **1**, 404 nm for compound **2**, 394 nm for compound **3**) at the beginning, versus time, and at the end of the reaction, respectively.

Reference

[1] J. Sworakowski, K. Janus and S. Nešpůrek, *Adv. Colloid Interface Sci.*, 2005, **116**, 97.

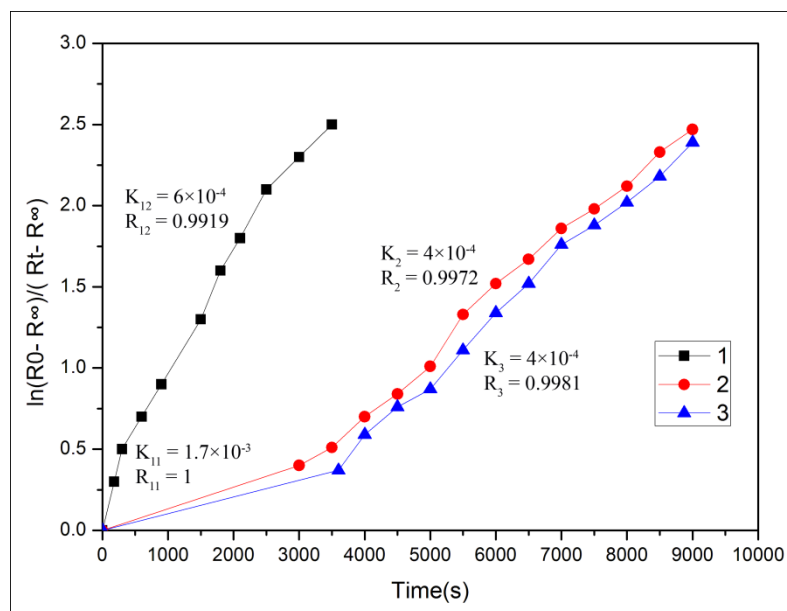

Fig. S5. Solid-state first-order photoresponsive rate plot for compounds **1-3**.
